# Supplementary material
Source: publisher figshare collection journal article supplement (https://karger.figshare.com/ndownloader/files/10987448)
Supplement: Supplementary file 1 [file 10987448]

*Figure S1*: For both gain and loss framed items, probability of risky choice selection as a function of age and probability of net increase from the risky option. a) Figures are rotated to include probability of net increase on the x-axis and age on the z-axis. b) Figures are rotated to include age on the x-axis and probability of net increase on the z-axis.
